# Supplementary material for: Erbium-formate frameworks templated by diammonium cations: syntheses, structures, structural transition and magnetic properties
Source: Royal Society of Chemistry journal article supplement (doi:10.1039/c1dt10241a), 2011-01-01
Supplement: c1dt10241a.pdf [file c1dt10241a.pdf]

Electronic Supporting Information for “Erbium-formate frameworks templated by diammonium cations: syntheses, structures, structural transition and magnetic properties” by Mengyuan Li *et al.*

Table S1. Fitting data of Cole-Cole semicircles of **1** using extended Debye model at different temperatures and different fields.

| T, K | $\chi_s, \text{cm}^3\text{mol}^{-1}$ | $\chi_T, \text{cm}^3\text{mol}^{-1}$ | $\tau, \text{s}$ | $\alpha$ | R                    |
|------|--------------------------------------|--------------------------------------|------------------|----------|----------------------|
| 1.8  | 1.90                                 | 4.10                                 | 0.159            | 0.15     | $3.1 \times 10^{-4}$ |
| 1.9  | 2.01                                 | 4.14                                 | 0.169            | 0.17     | $1.5 \times 10^{-4}$ |
| 2.0  | 2.15                                 | 3.95                                 | 0.158            | 0.17     | $1.2 \times 10^{-4}$ |
| 2.1  | 2.25                                 | 3.85                                 | 0.163            | 0.20     | $1.9 \times 10^{-4}$ |
| 2.2  | 2.34                                 | 3.79                                 | 0.181            | 0.20     | $1.8 \times 10^{-4}$ |
| 2.4  | 2.43                                 | 3.57                                 | 0.226            | 0.29     | $3.0 \times 10^{-5}$ |
| 2.5  | 2.47                                 | 3.61                                 | 0.331            | 0.30     | $2.7 \times 10^{-5}$ |
| 2.6  | 2.48                                 | 3.29                                 | 0.282            | 0.26     | $2.7 \times 10^{-5}$ |

  

| H, Oe | $\chi_s, \text{cm}^3\text{mol}^{-1}$ | $\chi_T, \text{cm}^3\text{mol}^{-1}$ | $\tau, \text{s}$ | $\alpha$ | R                    |
|-------|--------------------------------------|--------------------------------------|------------------|----------|----------------------|
| 400   | 3.65                                 | 4.34                                 | 0.241            | 0.34     | $1.3 \times 10^{-5}$ |
| 600   | 3.29                                 | 4.18                                 | 0.140            | 0.13     | $1.1 \times 10^{-5}$ |
| 1000  | 2.48                                 | 3.99                                 | 0.151            | 0.08     | $1.4 \times 10^{-4}$ |
| 1250  | 2.15                                 | 3.99                                 | 0.165            | 0.18     | $9.1 \times 10^{-5}$ |
| 1600  | 1.63                                 | 3.35                                 | 0.174            | 0.007    | $9.9 \times 10^{-4}$ |
| 1800  | 1.63                                 | 3.35                                 | 0.174            | 0.00     | $1.8 \times 10^{-3}$ |

Table S2. Fitting data of Cole-Cole semicircles of **2** using extended Debye model, and the relaxation time data derived from the peak positions of  $\chi''$  versus  $f$  plots at different temperatures and different fields.

| T, K | $\chi_S, \text{cm}^3\text{mol}^{-1}$ | $\chi_T, \text{cm}^3\text{mol}^{-1}$ | <sup>a</sup> $\tau, \text{s}$ | <sup>b</sup> $\tau_p, \text{s}$ | $\alpha$ | R                    |
|------|--------------------------------------|--------------------------------------|-------------------------------|---------------------------------|----------|----------------------|
| 1.8  | 1.40                                 | 3.20                                 | 0.211                         | 0.209                           | 0.061    | $6.8 \times 10^{-5}$ |
| 2.0  | 1.47                                 | 2.95                                 | 0.118                         | 0.122                           | 0.067    | $7.8 \times 10^{-5}$ |
| 2.2  | 1.60                                 | 2.75                                 | 0.082                         | 0.084                           | 0.070    | $6.0 \times 10^{-5}$ |
| 2.4  | 1.63                                 | 2.54                                 | 0.063                         | 0.069                           | 0.16     | $6.9 \times 10^{-5}$ |
| 2.6  | 1.72                                 | 2.37                                 | 0.060                         | 0.063                           | 0.16     | $2.7 \times 10^{-5}$ |
| 2.8  | 1.71                                 | 2.23                                 | 0.054                         | 0.062                           | 0.25     | $1.2 \times 10^{-5}$ |
| 3.0  | 1.81                                 | 2.07                                 | 0.069                         | 0.062                           | 0.020    | $4.7 \times 10^{-5}$ |
| 3.2  | 1.68                                 | 1.99                                 | 0.053                         | 0.059                           | 0.36     | $1.2 \times 10^{-5}$ |
| 3.4  | 1.66                                 | 1.88                                 | 0.057                         | 0.061                           | 0.35     | $8.1 \times 10^{-6}$ |

| H, Oe | $\chi_S, \text{cm}^3\text{mol}^{-1}$ | $\chi_T, \text{cm}^3\text{mol}^{-1}$ | $\tau, \text{s}$ | $\tau_p, \text{s}$ | $\alpha$ | R                    |
|-------|--------------------------------------|--------------------------------------|------------------|--------------------|----------|----------------------|
| 400   | 2.71                                 | 3.03                                 | 0.029            | 0.040              | 0.32     | $4.7 \times 10^{-6}$ |
| 600   | 2.48                                 | 3.01                                 | 0.037            | 0.040              | 0.23     | $8.9 \times 10^{-6}$ |
| 800   | 2.18                                 | 3.00                                 | 0.042            | 0.044              | 0.24     | $2.2 \times 10^{-5}$ |
| 1000  | 1.88                                 | 2.99                                 | 0.049            | 0.055              | 0.28     | $4.3 \times 10^{-5}$ |
| 1250  | 1.59                                 | 2.97                                 | 0.063            | 0.064              | 0.27     | $7.2 \times 10^{-5}$ |
| 1500  | 1.35                                 | 2.93                                 | 0.078            | 0.080              | 0.28     | $1.3 \times 10^{-4}$ |
| 1800  | 1.16                                 | 2.87                                 | 0.104            | 0.110              | 0.26     | $1.8 \times 10^{-4}$ |
| 2000  | 1.00                                 | 2.87                                 | 0.127            | 0.127              | 0.29     | $2.2 \times 10^{-4}$ |
| 4000  | 0.50                                 | 2.30                                 | 0.401            | 0.398              | 0.21     | $5.1 \times 10^{-4}$ |
| 6000  | 0.34                                 | 1.64                                 | 0.629            | 0.531              | 0.18     | $6.3 \times 10^{-4}$ |
| 10000 | 0.23                                 | 0.84                                 | 0.904            | 0.796              | 0.21     | $6.9 \times 10^{-4}$ |
| 15000 |                                      |                                      |                  | 0.692              |          |                      |

*a.* relaxation time from fitting procedure. *b.* relaxation time from the peak positions of  $\chi''$  versus  $f$  plots.

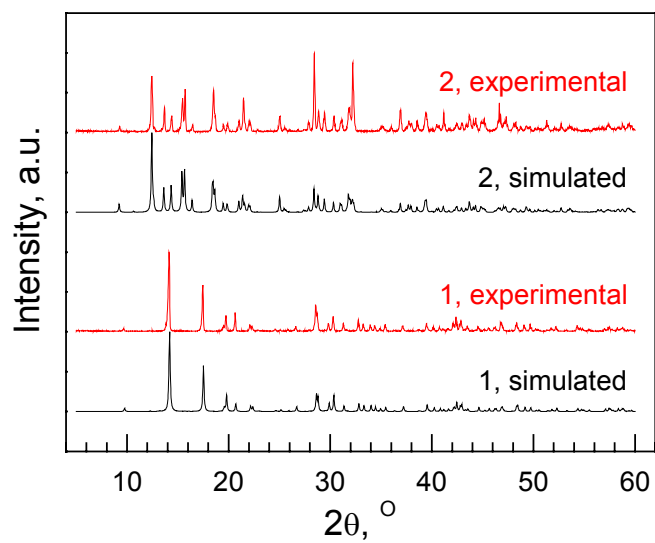

Fig. S1. The experimental PXRD patterns at room temperature and the simulated ones based on the single crystal structures of **1** to **2** at 290 K.

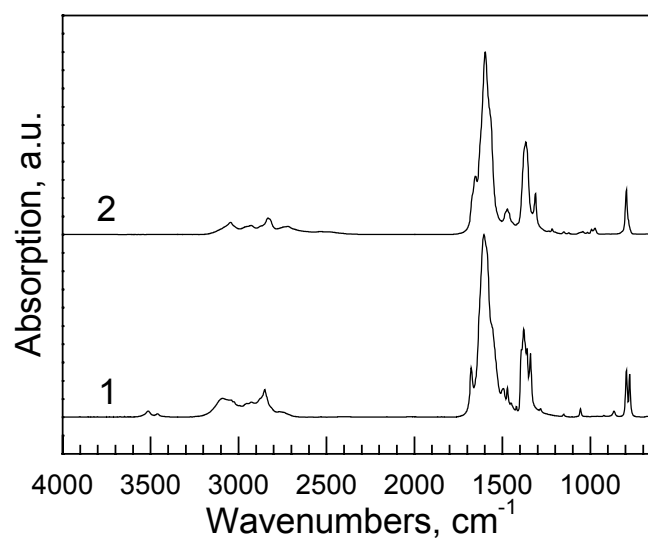

Fig. S2. IR spectra of **1** and **2** at room temperature.

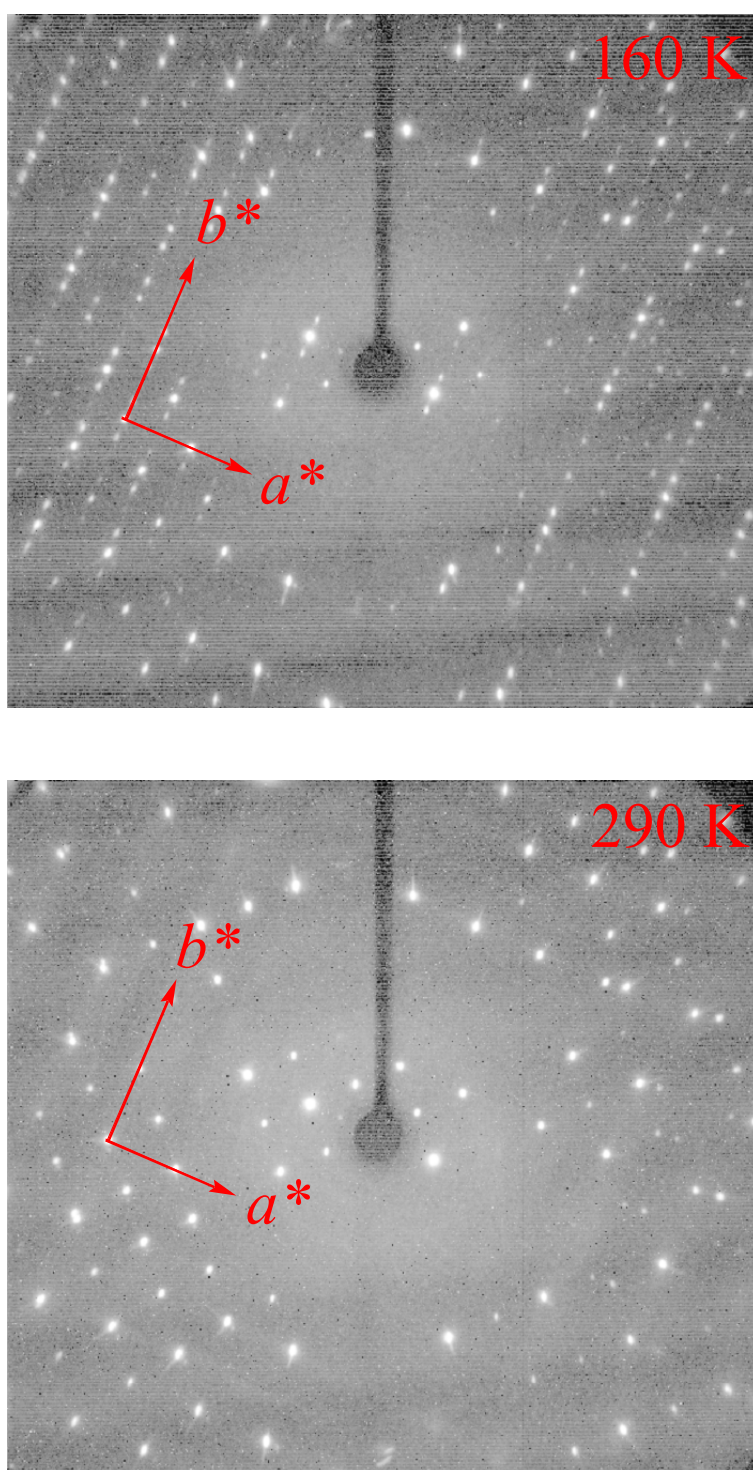

Fig. S3. The oscillation images of **2** at 160 K and 290 K, collected with the  $c$ -axis toward the primary beam and oscillated around an axis perpendicular to  $c$ -axis. At 160 K newly appeared diffraction spots indicated the doubling of  $b$  axis.

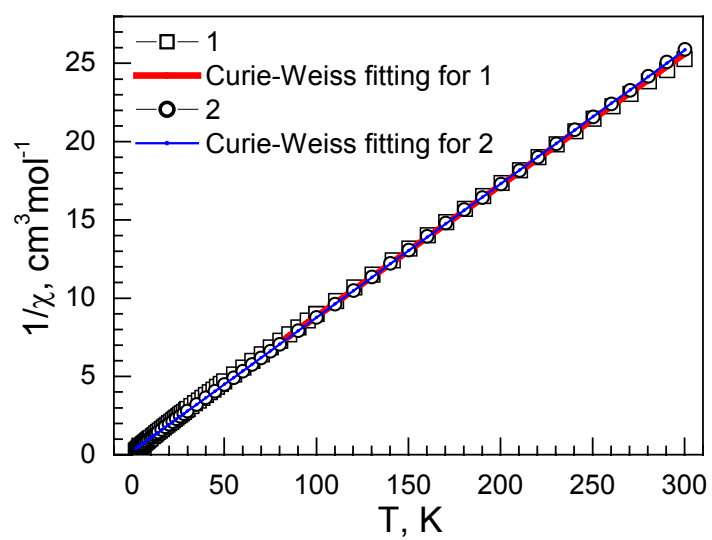

Fig. S4. The  $1/\chi$  vs  $T$  plots for **1** and **2**, with the Curie-Weiss fits in red and blue lines.

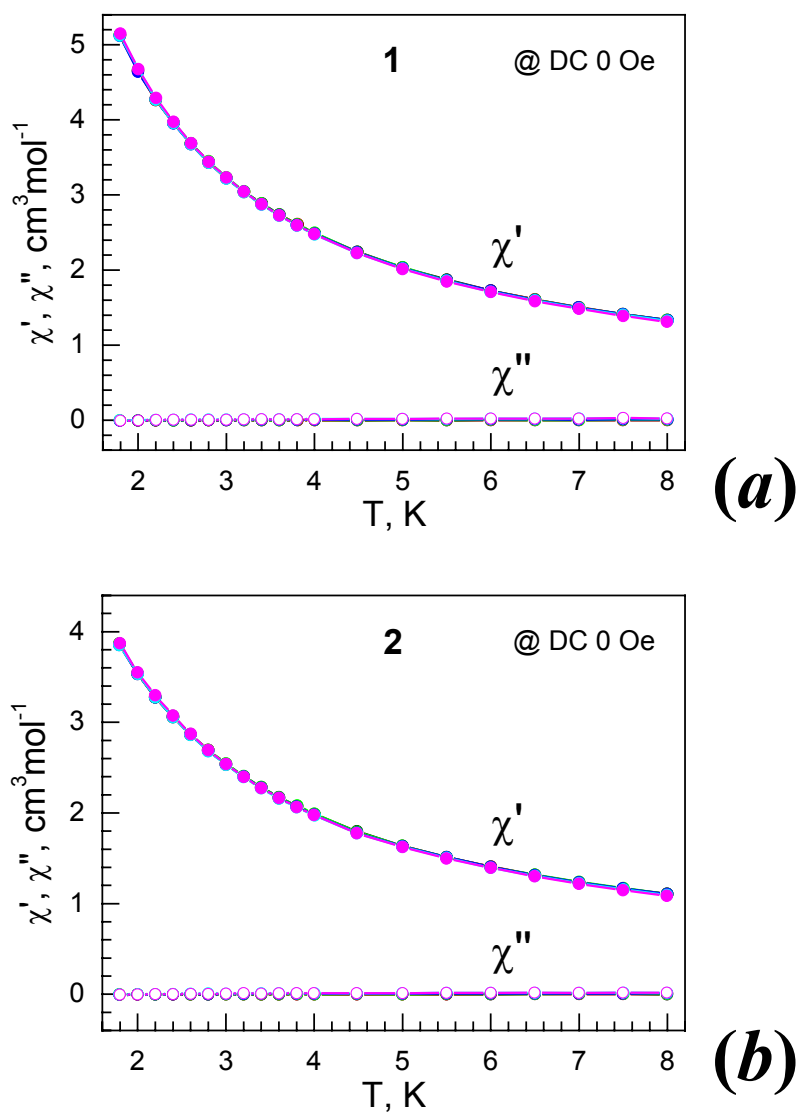

Fig. S5. Temperature dependence of ac susceptibilities of **1** (a) and **2** (b) under a zero dc field with an oscillating field of 3 Oe in frequencies of 10, 32, 100, 320, 1000 and 1500 Hz.

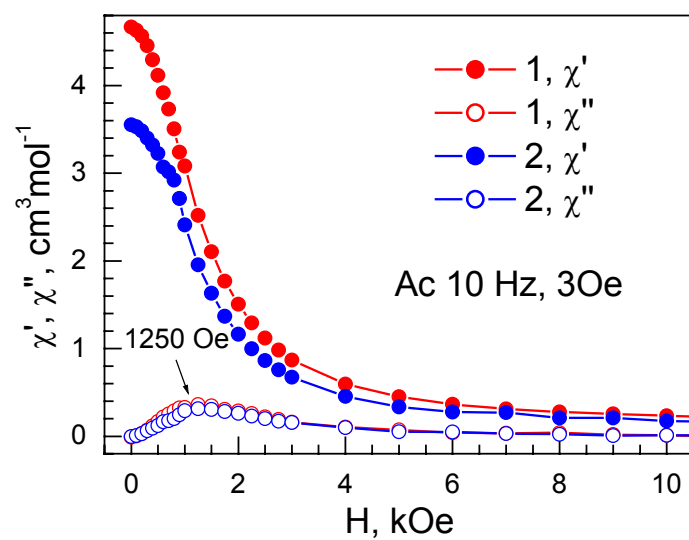

Fig. S6. Isothermal ac susceptibilities with an oscillating field of 3 Oe and frequency of 10 Hz for **1** and **2** at 2.0 K, under different bias static fields.



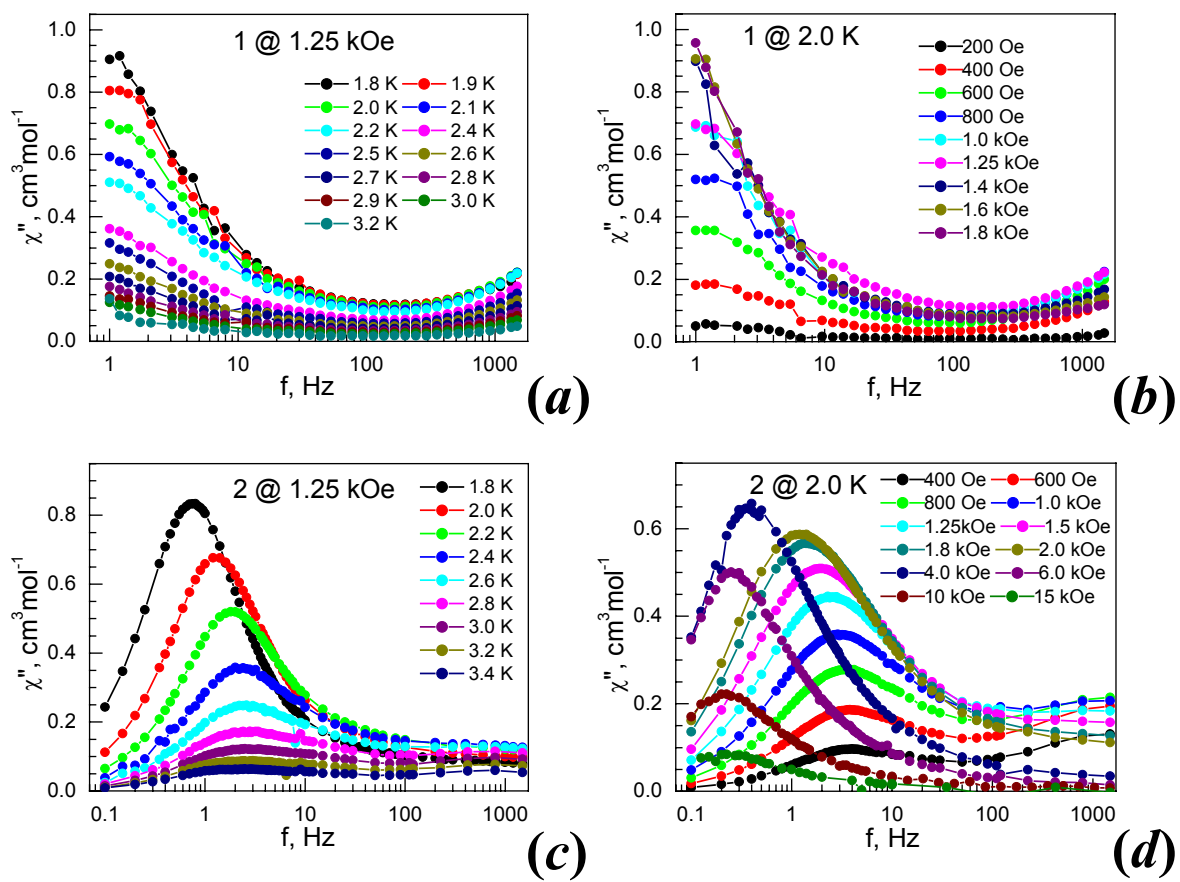

Fig. S7.  $\chi''$  versus  $f$  plots for 1 (a and b) and 2 (c and d)

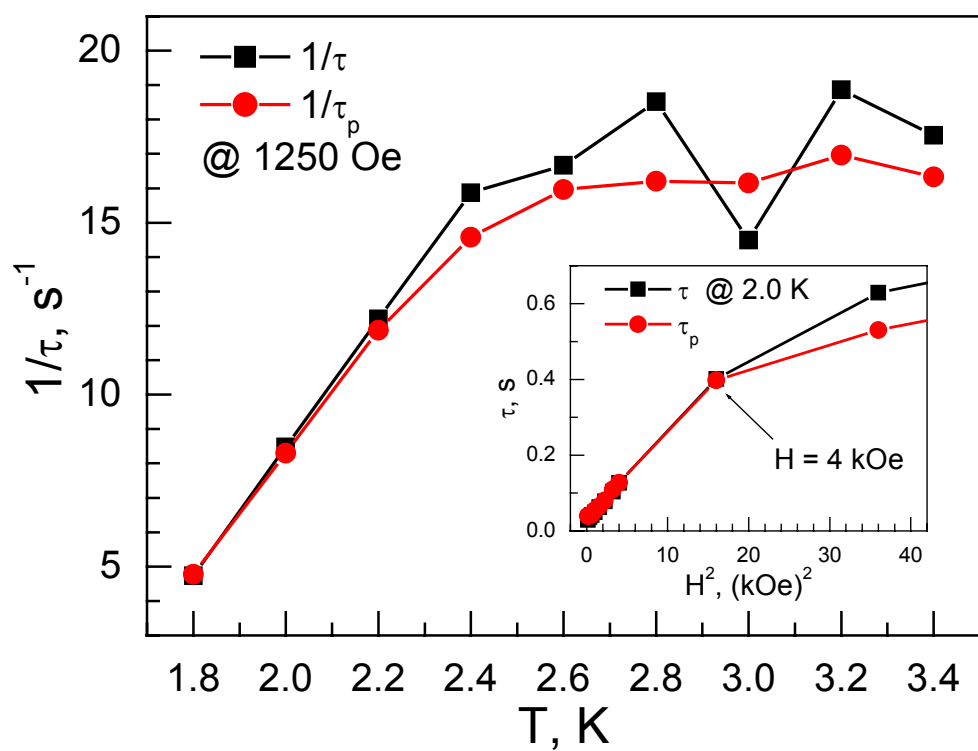

Fig. S8.  $1/\tau$  versus  $T$  and  $\tau$  versus  $H^2$  (inset) plots for **2**. Lines are for guiding.
